# Supplementary material for: Strong reproductive barriers in a narrow hybrid zone of West-Mediterranean green toads (Bufo viridissubgroup) with Plio-Pleistocene divergence
Source: Springer Nature journal article supplement (doi:10.1186/1471-2148-10-232), 2010-07-29
Supplement: Additional file 4 [file 1471-2148-10-232-s4.pdf]

**Additional file 4** – Pairwise  $F_{ST}$  between populations (below diagonal) and their respective significance (above diagonal). Significance levels are indicated as follows: \* < 0.05, \*\* < 0.01, and \*\*\* < 0.001.

| Population | 5    | 6    | 8    | 9    | 10   | 13   | 14   | 15   | 16   | 17   | 18   | 21   | 22   | 23  |
|------------|------|------|------|------|------|------|------|------|------|------|------|------|------|-----|
| 5          |      | *    | ***  | ***  | ***  | **   | ***  | ***  | ***  | ***  | ***  | ***  | ***  | *** |
| 6          | 0.05 |      | ***  | ***  | ***  | ***  | ***  | ***  | ***  | ***  | ***  | ***  | ***  | *** |
| 8          | 0.2  | 0.16 |      | ***  | ***  | ***  | ***  | ***  | ***  | ***  | ***  | ***  | ***  | *** |
| 9          | 0.25 | 0.23 | 0.12 |      | ***  | ***  | ***  | ***  | ***  | ***  | ***  | ***  | ***  | *** |
| 10         | 0.18 | 0.13 | 0.11 | 0.07 |      | ***  | ***  | ***  | ***  | ***  | ***  | ***  | ***  | *** |
| 13         | 0.21 | 0.17 | 0.14 | 0.18 | 0.11 |      | ***  | ***  | ***  | ***  | ***  | ***  | ***  | *** |
| 14         | 0.39 | 0.28 | 0.24 | 0.3  | 0.26 | 0.12 |      | ***  | ***  | ***  | ***  | ***  | ***  | *** |
| 15         | 0.3  | 0.31 | 0.39 | 0.39 | 0.35 | 0.4  | 0.52 |      | ***  | ***  | ***  | ***  | ***  | *** |
| 16         | 0.26 | 0.28 | 0.31 | 0.31 | 0.26 | 0.32 | 0.46 | 0.3  |      | ***  | ***  | ***  | ***  | *** |
| 17         | 0.18 | 0.2  | 0.27 | 0.27 | 0.23 | 0.27 | 0.41 | 0.16 | 0.1  |      | ***  | ***  | ***  | *** |
| 18         | 0.18 | 0.2  | 0.26 | 0.26 | 0.21 | 0.25 | 0.41 | 0.17 | 0.09 | 0.02 |      | **   | ***  | *** |
| 21         | 0.2  | 0.23 | 0.26 | 0.26 | 0.21 | 0.27 | 0.4  | 0.23 | 0.12 | 0.09 | 0.07 |      | ***  | *** |
| 22         | 0.33 | 0.34 | 0.36 | 0.38 | 0.31 | 0.38 | 0.52 | 0.39 | 0.24 | 0.21 | 0.16 | 0.11 |      | *** |
| 23         | 0.31 | 0.32 | 0.35 | 0.36 | 0.32 | 0.36 | 0.51 | 0.28 | 0.19 | 0.18 | 0.16 | 0.16 | 0.32 |     |
